# Supplementary material for: Machine Learning-Based Predictive Model for Tensile and Flexural Strength of 3D-Printed Concrete
Source: MDPI journal article supplement (doi:10.3390/ma16114149), 2023-06-02
Supplement: s1 [file s1]

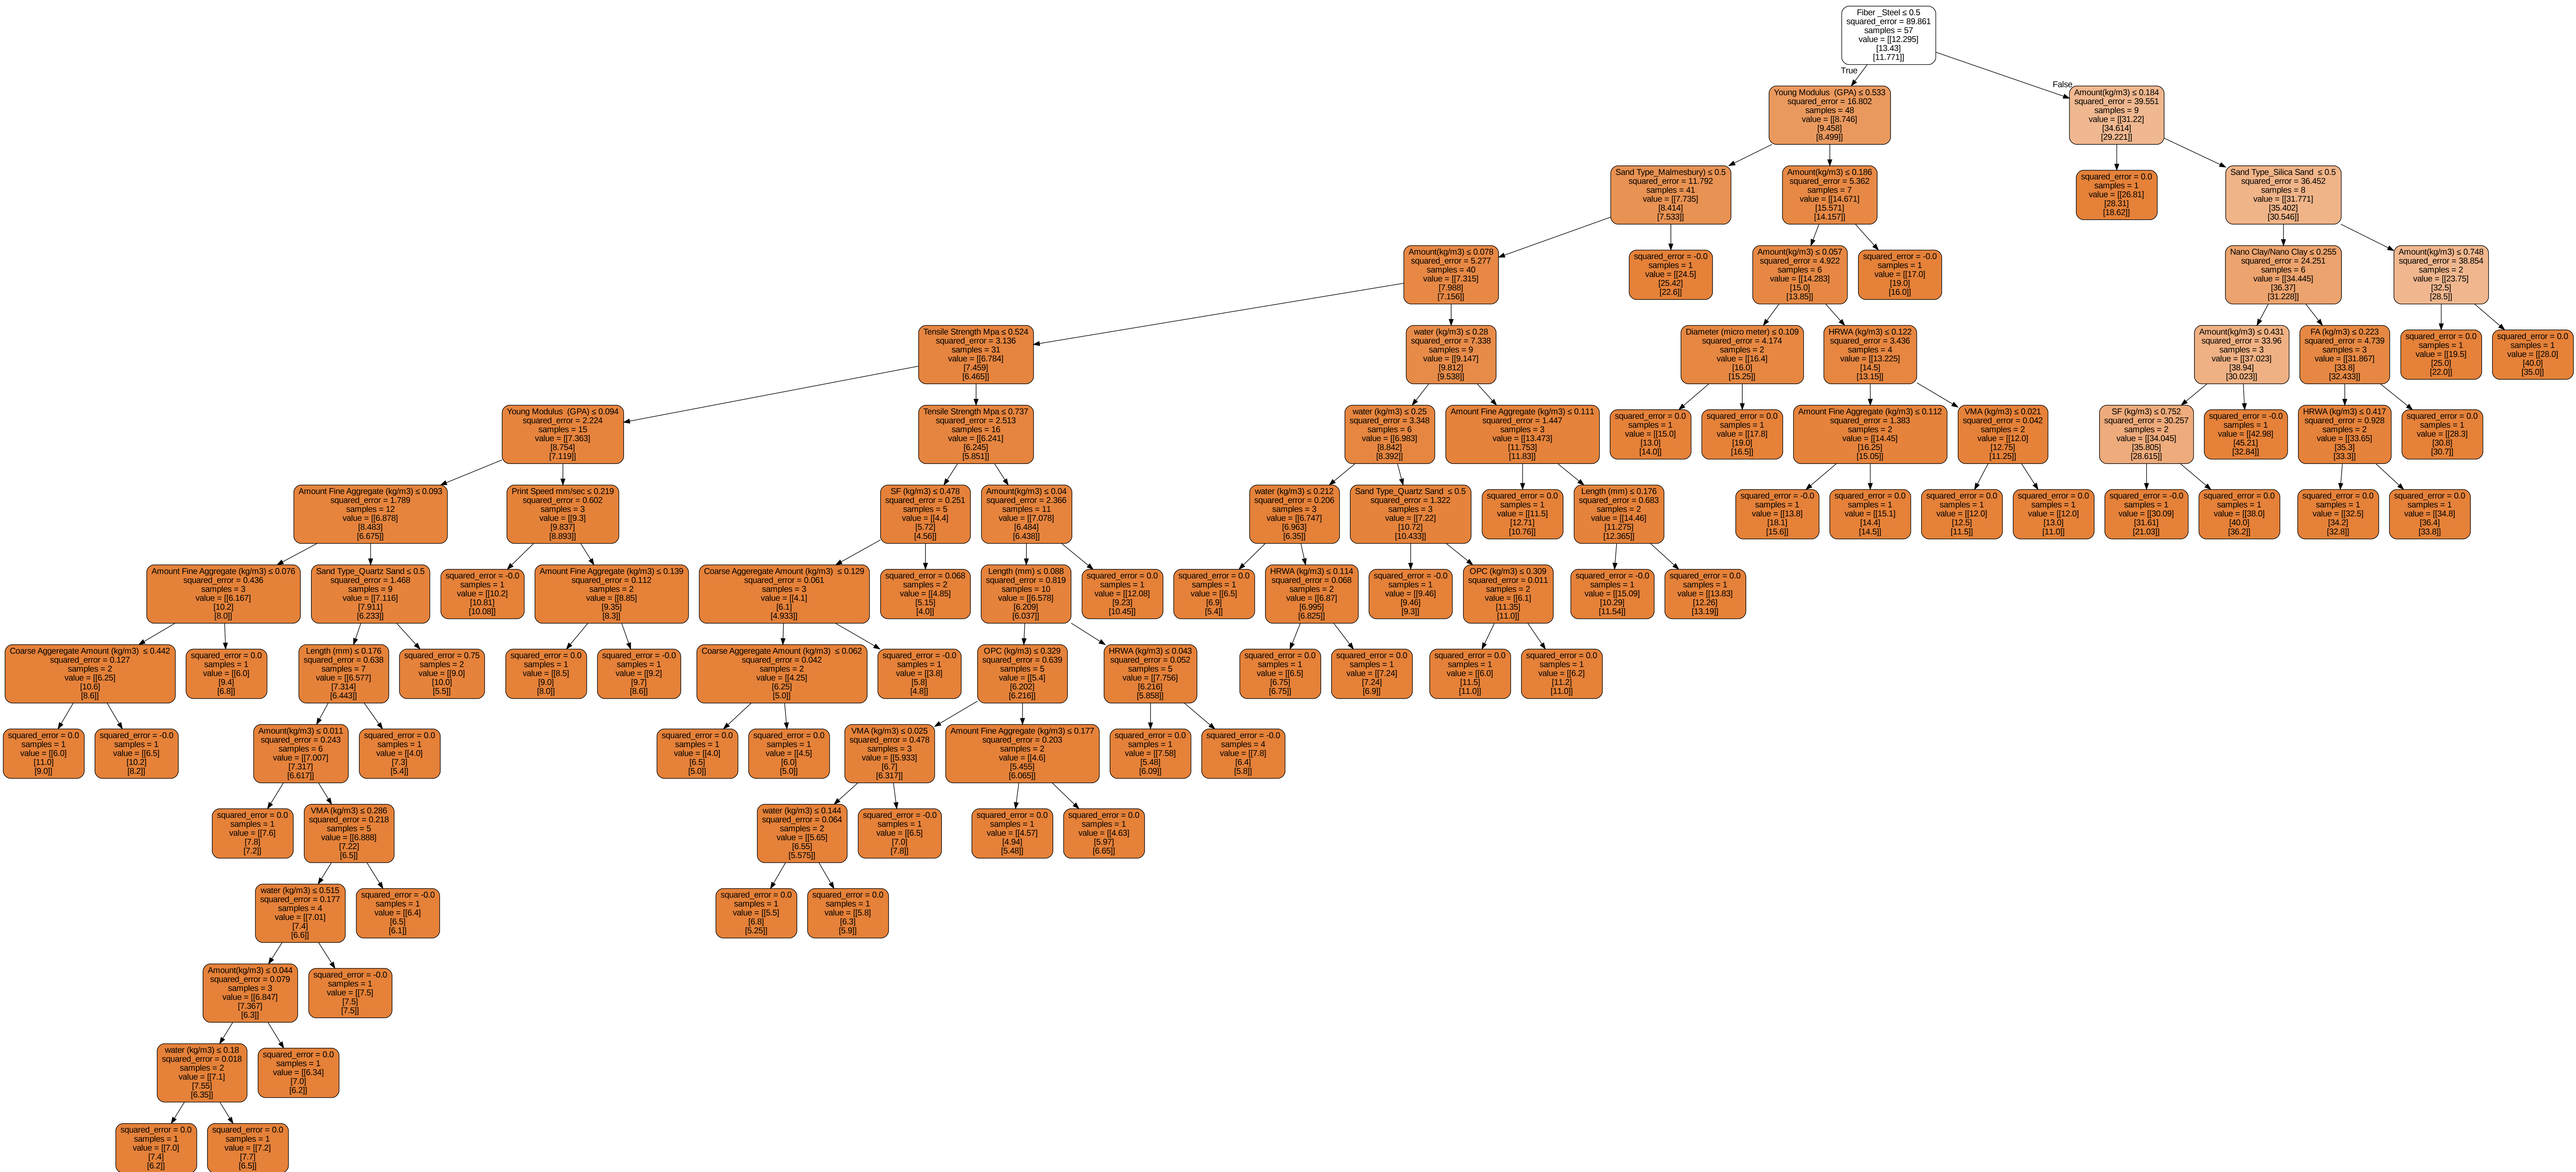

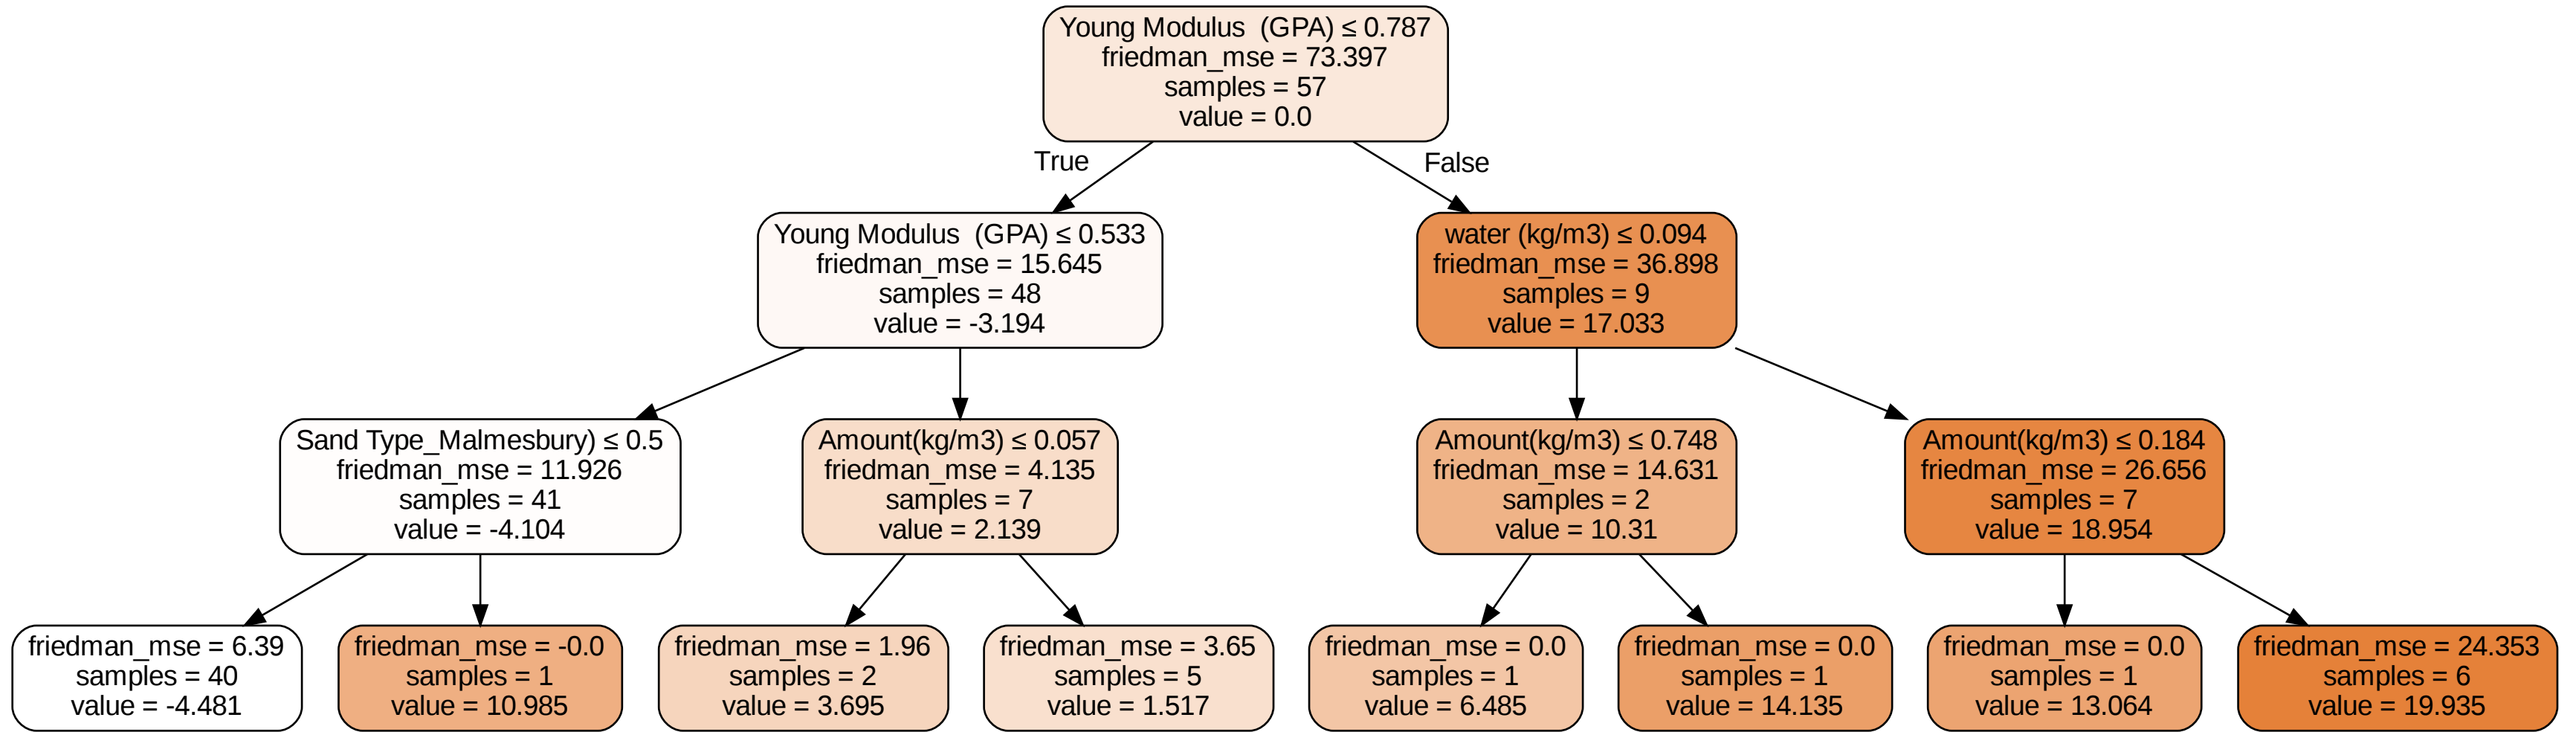

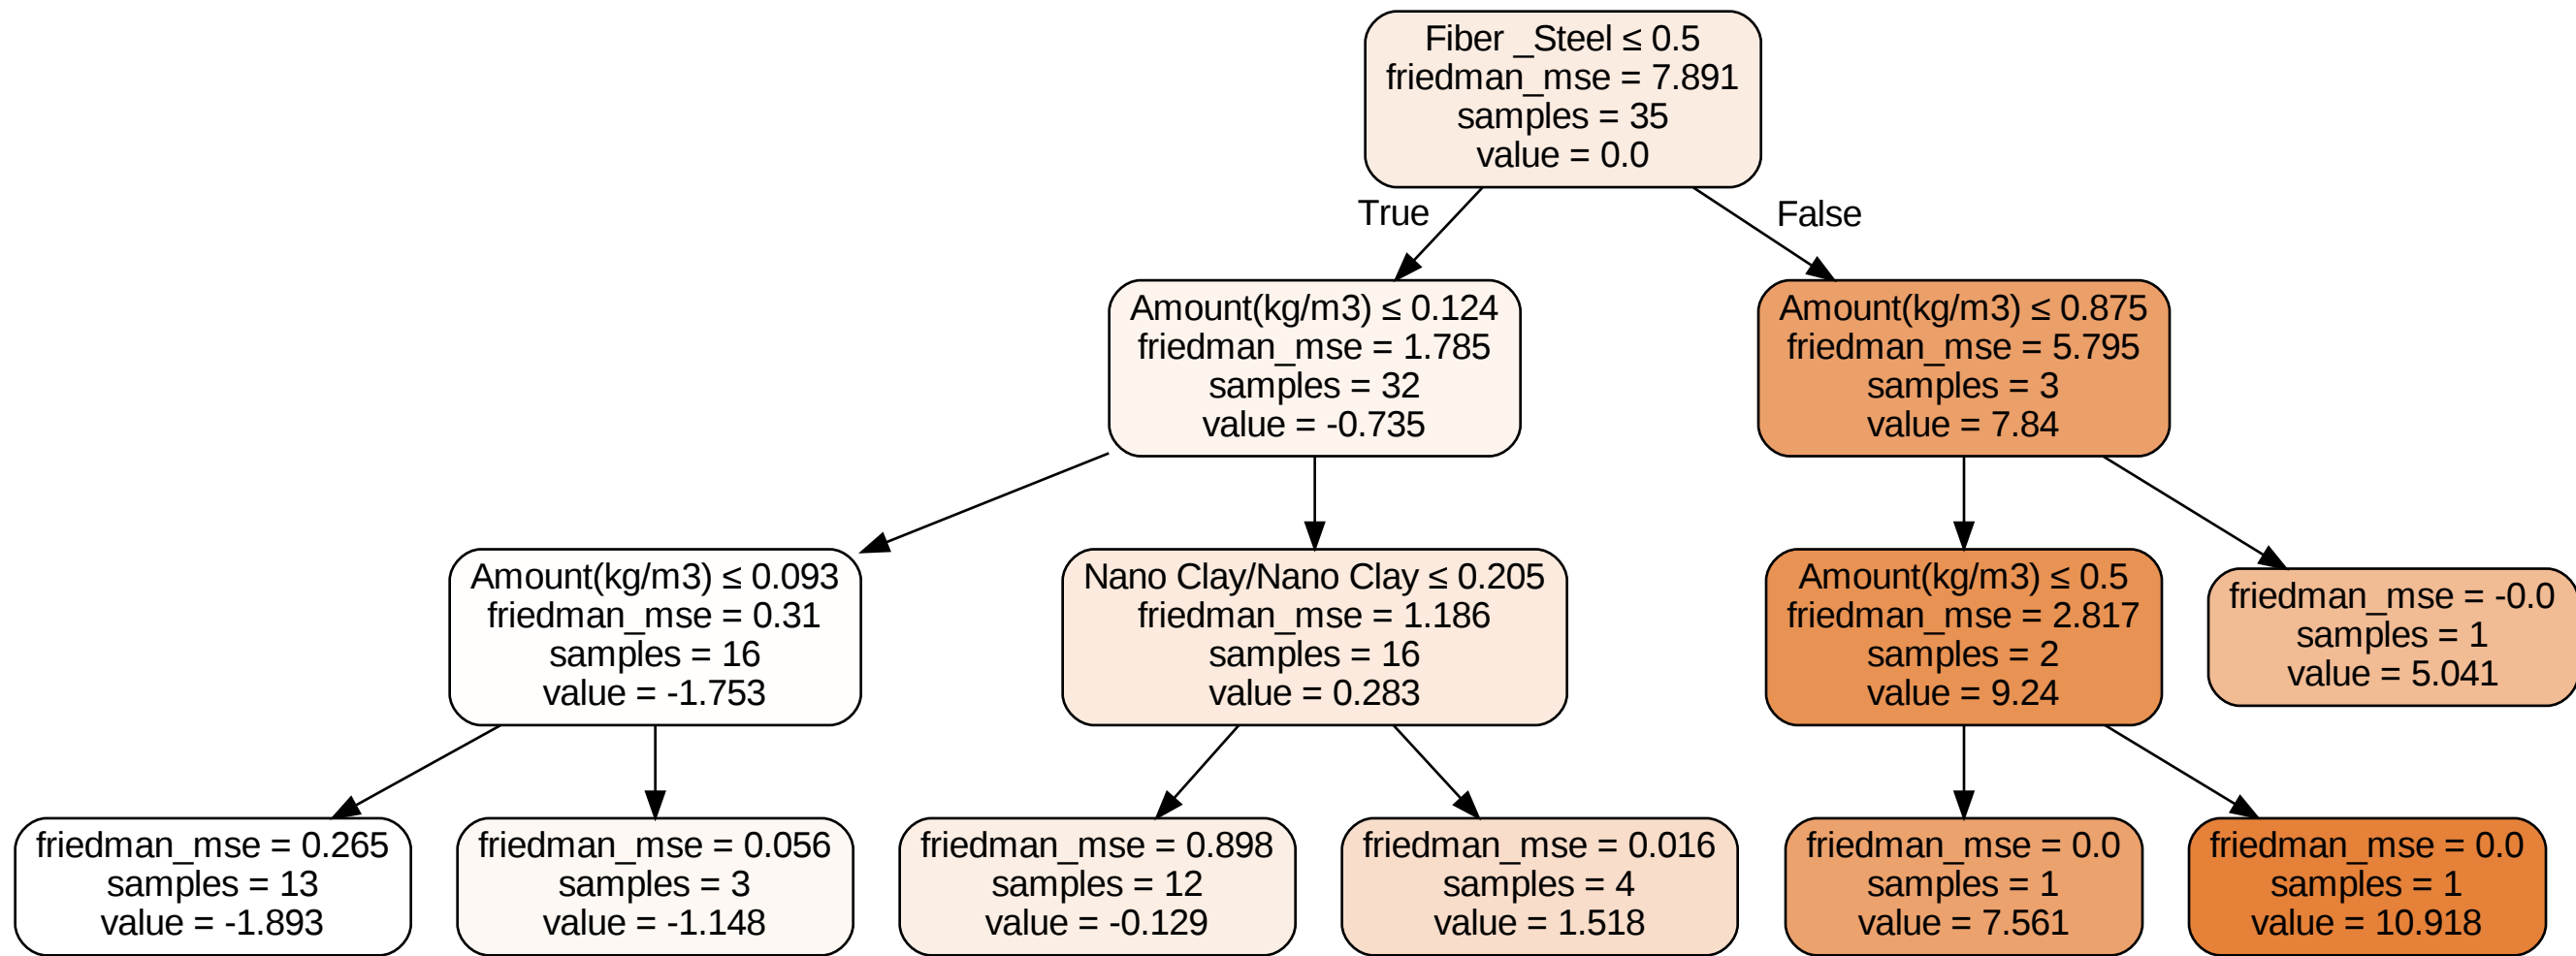



## DOI

**LINK**

<https://doi.org/10.1016/j.jobe.2022.104745>      <https://www.sciencedirect.com/science/article/abs>  
<https://doi.org/10.1016/j.cemconres.2021.1063> <https://www.sciencedirect.com/science/article/abs>  
<https://doi.org/10.1016/j.matdes.2019.108088> <https://www.sciencedirect.com/science/article/pii/>  
<https://doi.org/10.1016/j.conbuildmat.2021.122> <https://www.sciencedirect.com/science/article/abs>  
<https://doi.org/10.1016/j.jobe.2021.102944>      <https://www.sciencedirect.com/science/article/abs>  
<https://doi.org/10.1016/j.acme.2017.02.008>      <https://www.sciencedirect.com/science/article/abs>  
<https://doi.org/10.1016/j.compstruct.2020.1128> <https://www.sciencedirect.com/science/article/abs>  
<https://doi.org/10.1016/j.ceramint.2021.06.124> <https://www.sciencedirect.com/science/article/abs>  
<https://doi.org/10.1016/j.cemconres.2021.1063> <https://www.sciencedirect.com/science/article/abs>  
<https://doi.org/10.1016/j.conbuildmat.2019.116> <https://www.sciencedirect.com/science/article/abs>  
[https://doi.org/10.1007/978-3-030-49916-7\\_53](https://doi.org/10.1007/978-3-030-49916-7_53) [https://link.springer.com/chapter/10.1007/978-3-030-49916-7\\_53](https://link.springer.com/chapter/10.1007/978-3-030-49916-7_53)  
<https://doi.org/10.1016/j.jclepro.2021.128720>      <https://www.sciencedirect.com/science/article/abs>  
<https://doi.org/10.1016/j.matdes.2019.108088>      <https://www.sciencedirect.com/science/article/pii/S0926641019304091>  
<https://doi.org/10.1016/j.conbuildmat.2019.01.116> <https://www.sciencedirect.com/science/article/abs>  
<https://doi.org/10.1016/j.conbuildmat.2017.12.116> <https://www.sciencedirect.com/science/article/abs>  
doi:10.3151/jact.19.1264doi:10.3151/jact.19.1264doi:10.3151/jact.19.1264  
<https://doi.org/10.1016/j.cemconcomp.2021.101010> <https://www.sciencedirect.com/science/article/abs>  
<https://doi.org/10.3390/ma11122352>      <https://www.mdpi.com/1996-1944/11/12/2352>  
<https://doi.org/10.1016/j.conbuildmat.2019.01.116> <https://www.sciencedirect.com/science/article/abs>  
<https://doi.org/10.1016/j.cemconcomp.2021.101010> <https://www.sciencedirect.com/science/article/abs>  
<https://doi.org/10.1016/j.cemconres.2022.1068> <https://www.sciencedirect.com/science/article/abs>  
<https://doi.org/10.1016/j.conbuildmat.2021.122> <https://www.sciencedirect.com/science/article/abs>  
<https://doi.org/10.1016/j.conbuildmat.2020.1128> <https://www.sciencedirect.com/science/article/abs>  
<https://doi.org/10.1016/j.conbuildmat.2021.122> <https://www.sciencedirect.com/science/article/abs>  
<https://doi.org/10.1016/j.cemconres.2021.1063> <https://www.sciencedirect.com/science/article/abs>
